# Supplementary material for: GRB2 couples RhoU to epidermal growth factor receptor signaling and cell migration
Source: PubMed Central journal article supplement — Mol Biol Cell. 2011 Jun 15;22(12):2119–30. doi: 10.1091/mbc.E10-12-0969 (PMC3113775; doi:10.1091/mbc.e10-12-0969), 2011-06-15

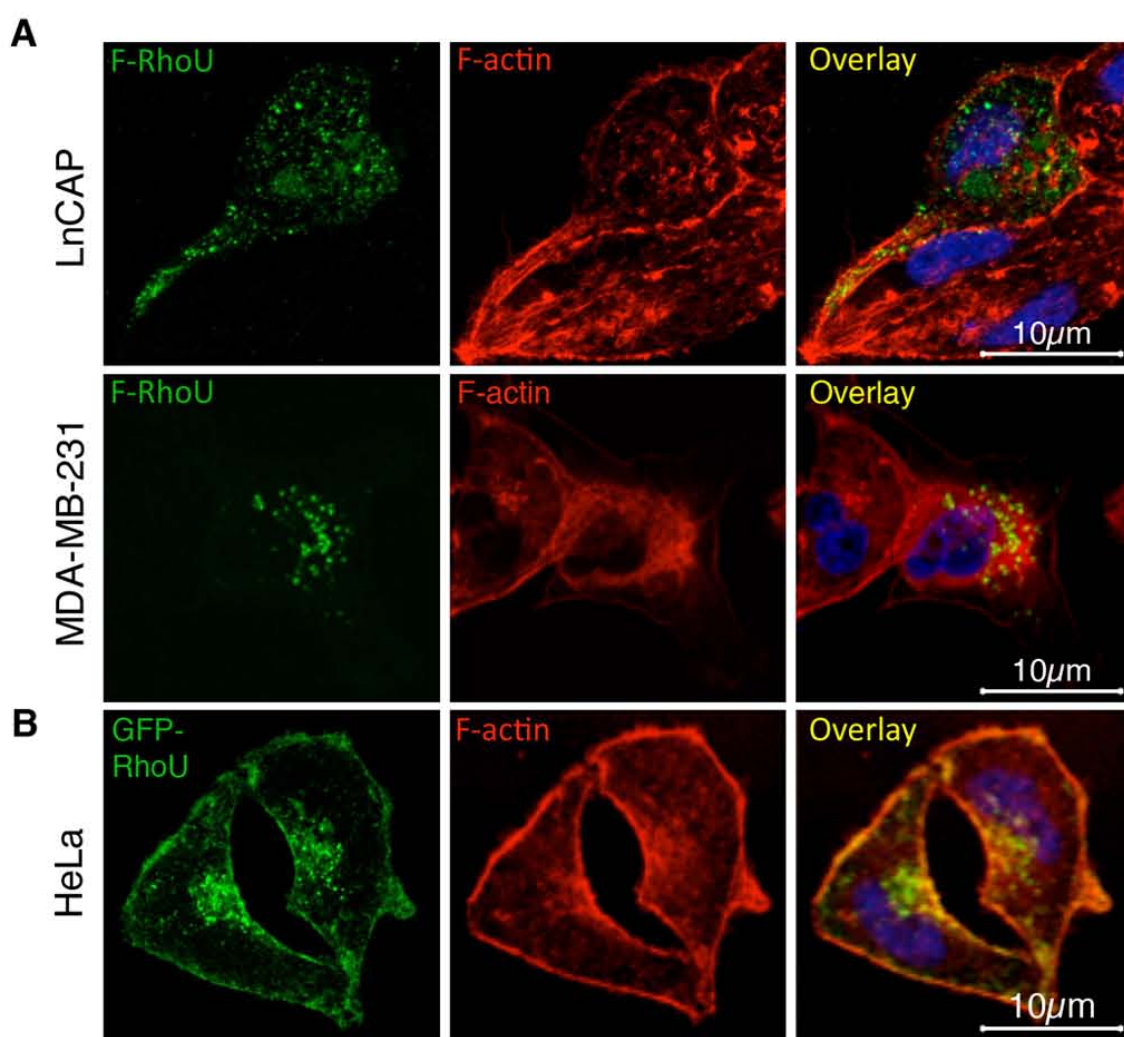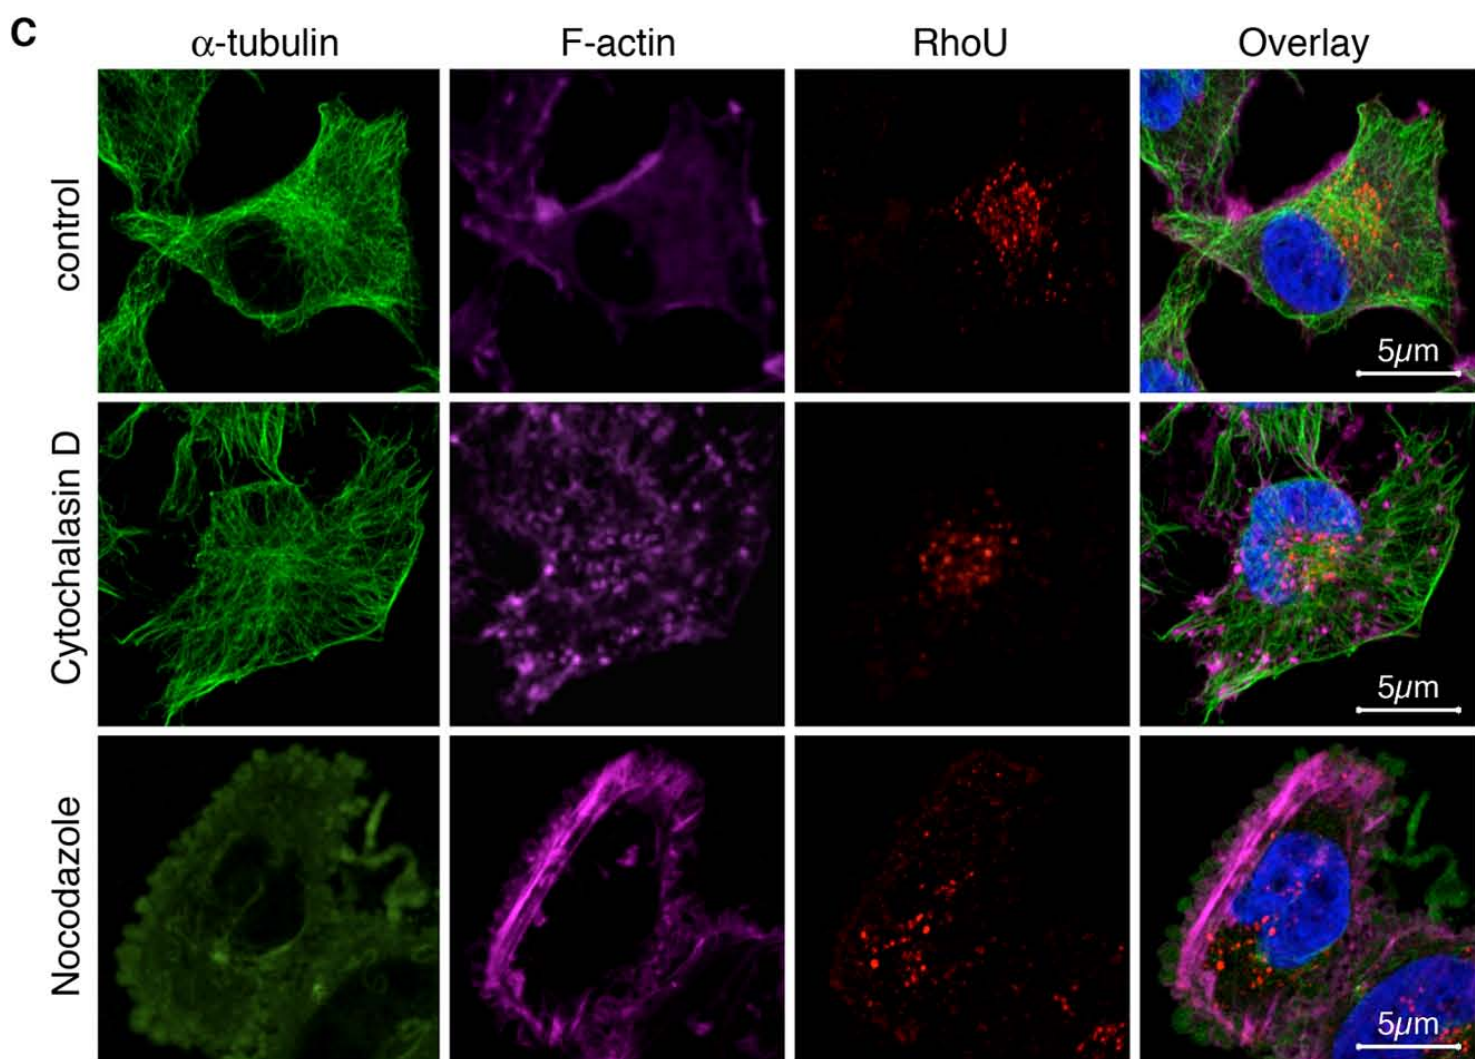

supplementary figure 1, Zhang et al.

**A**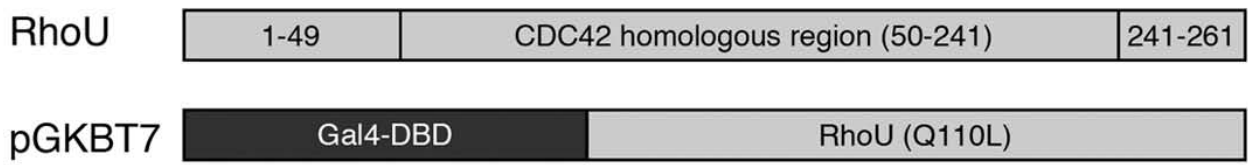**B**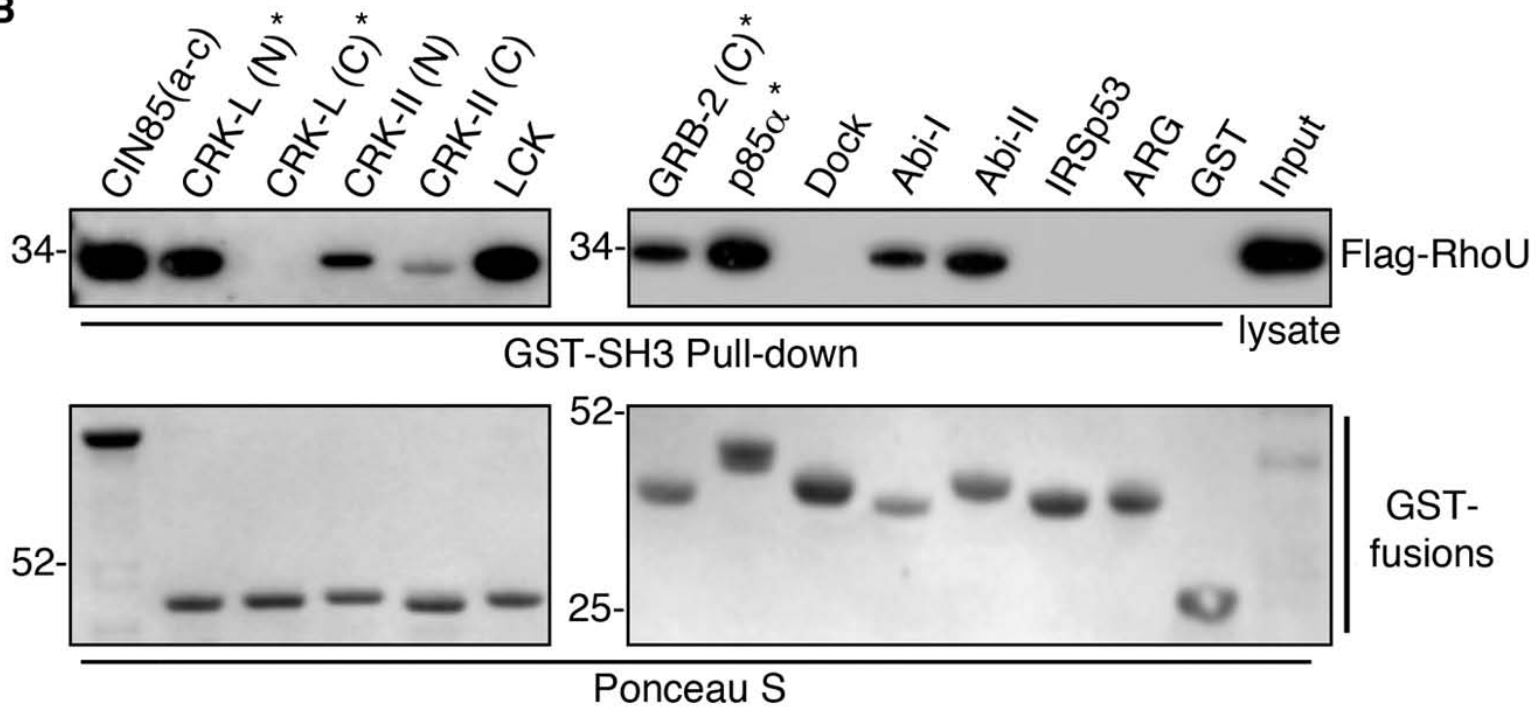**C**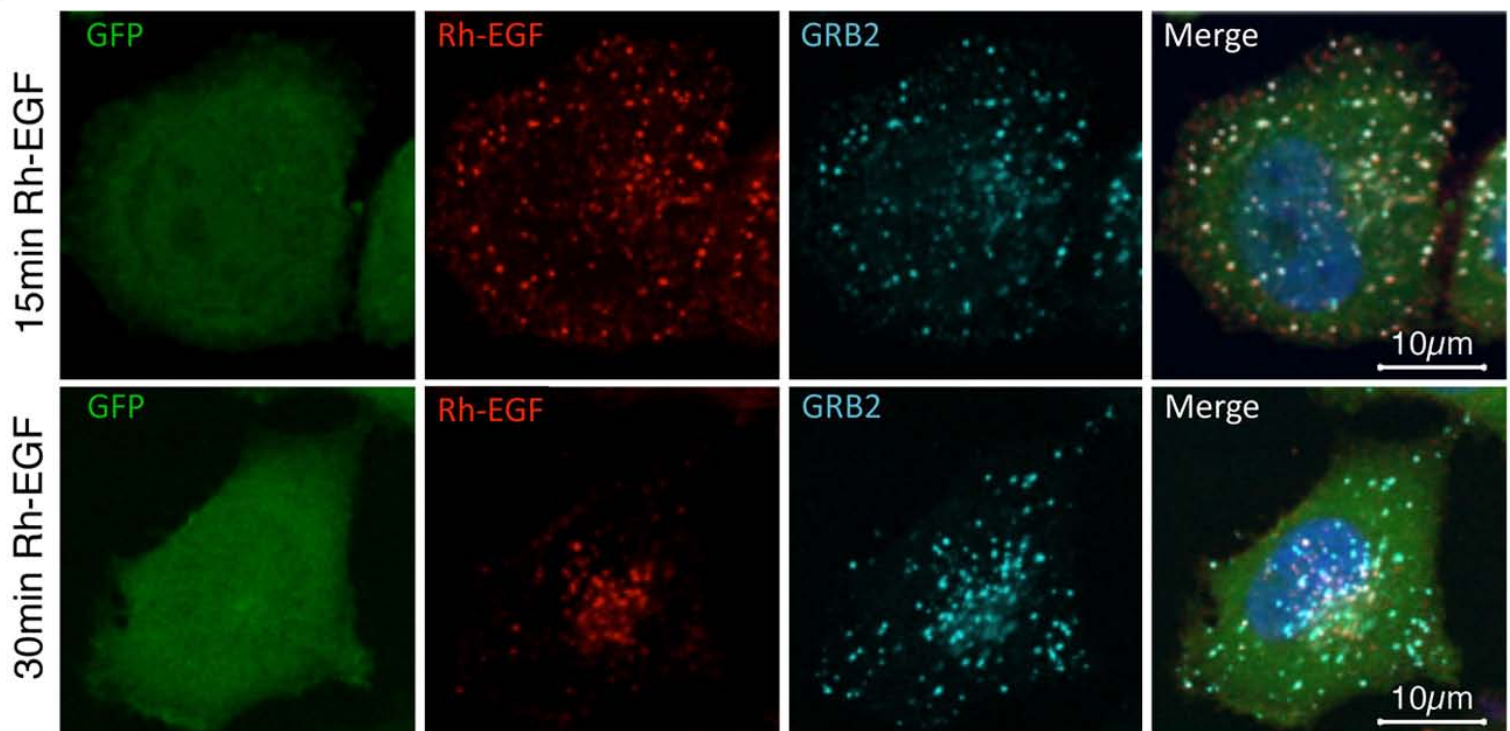**D**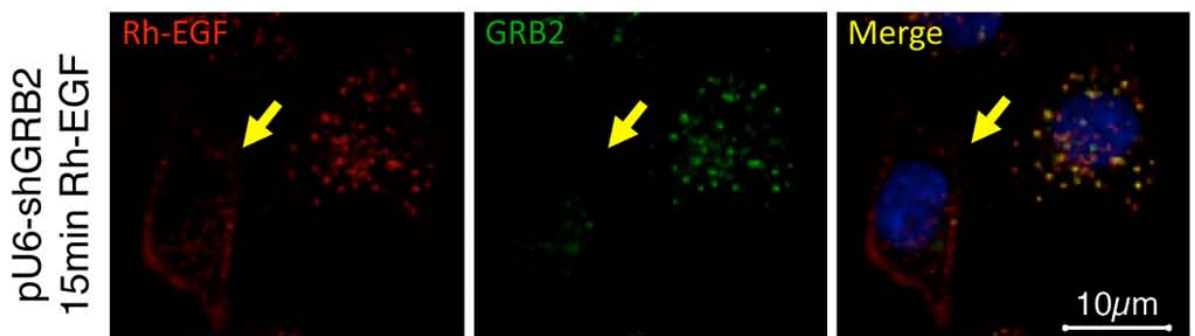

supplementary figure 2, Zhang et al.



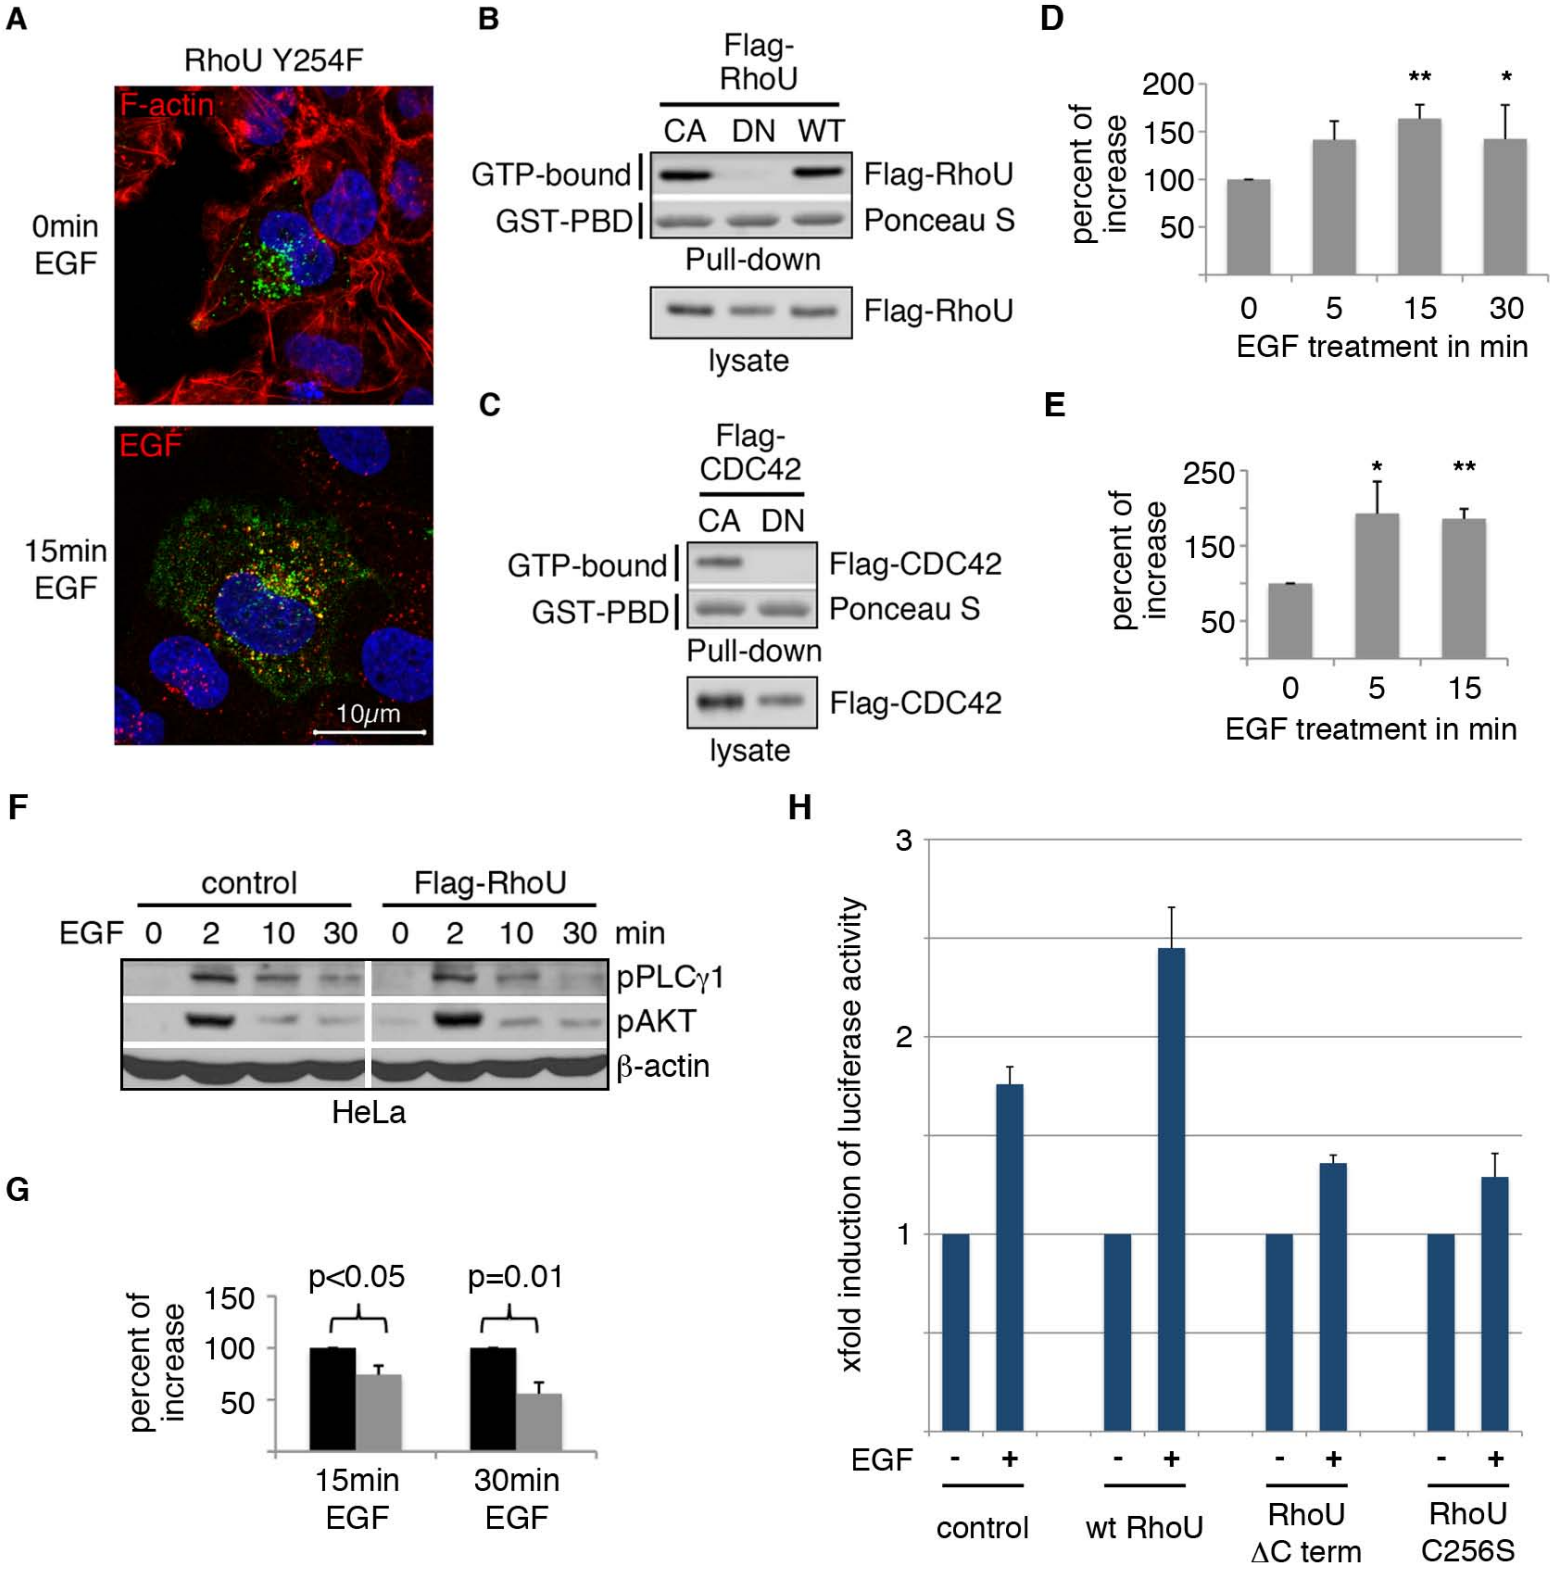

supplementary figure 3, Zhang et al.

**A**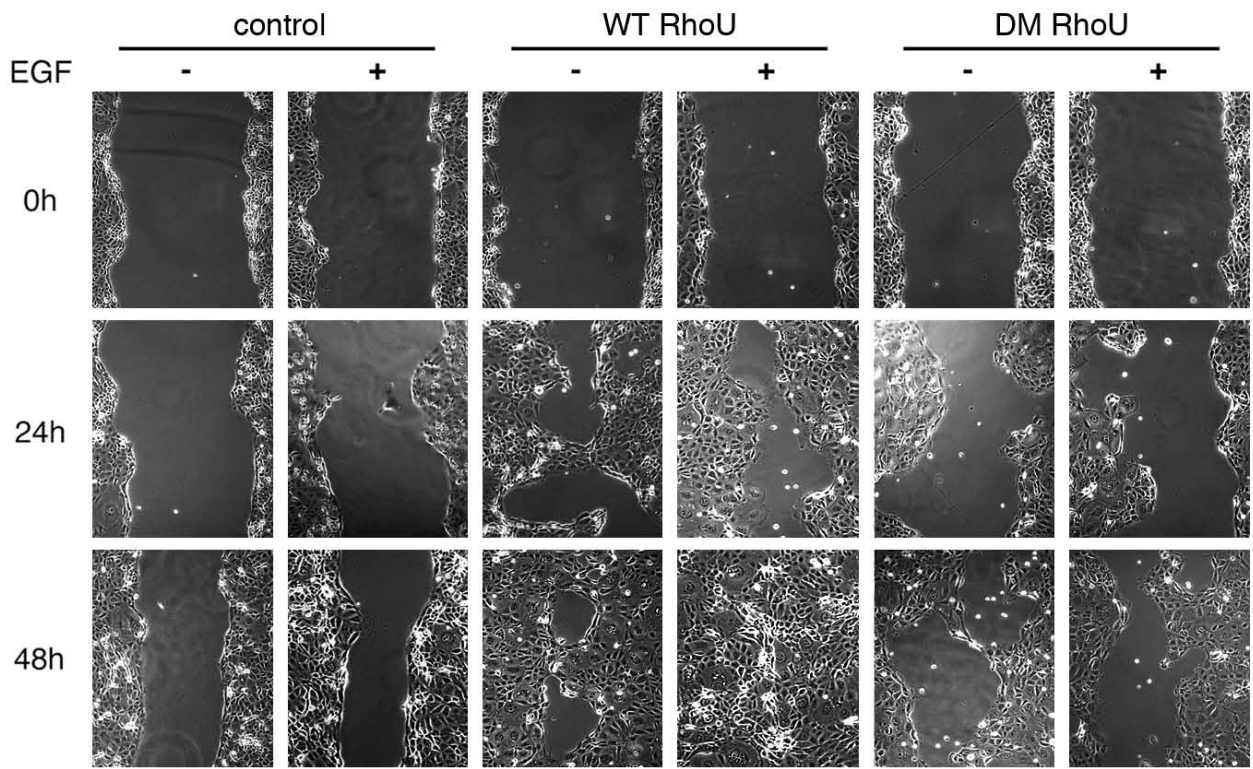**B**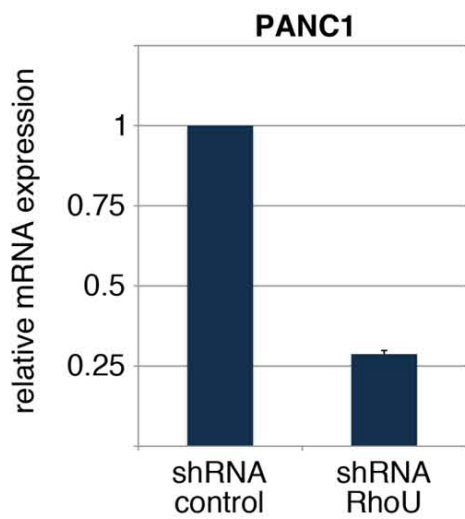**C**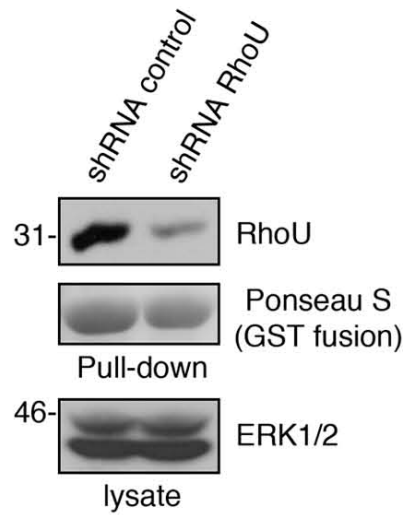**D**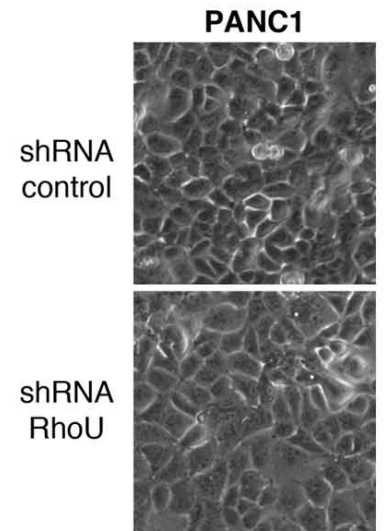**E**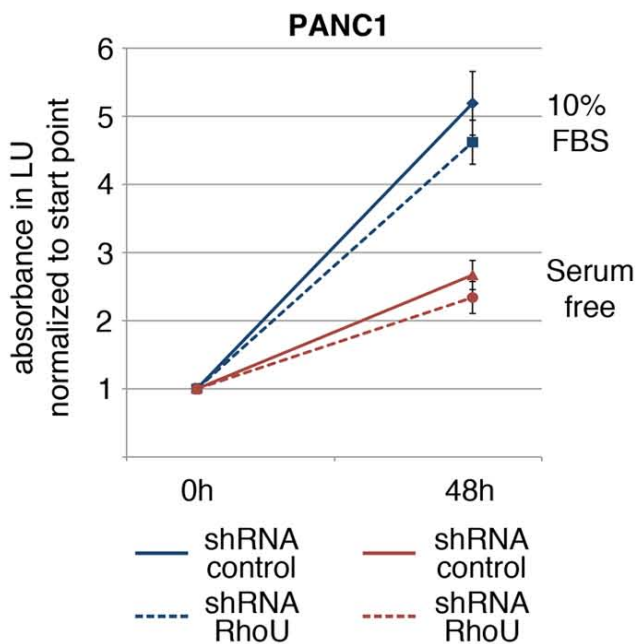**F**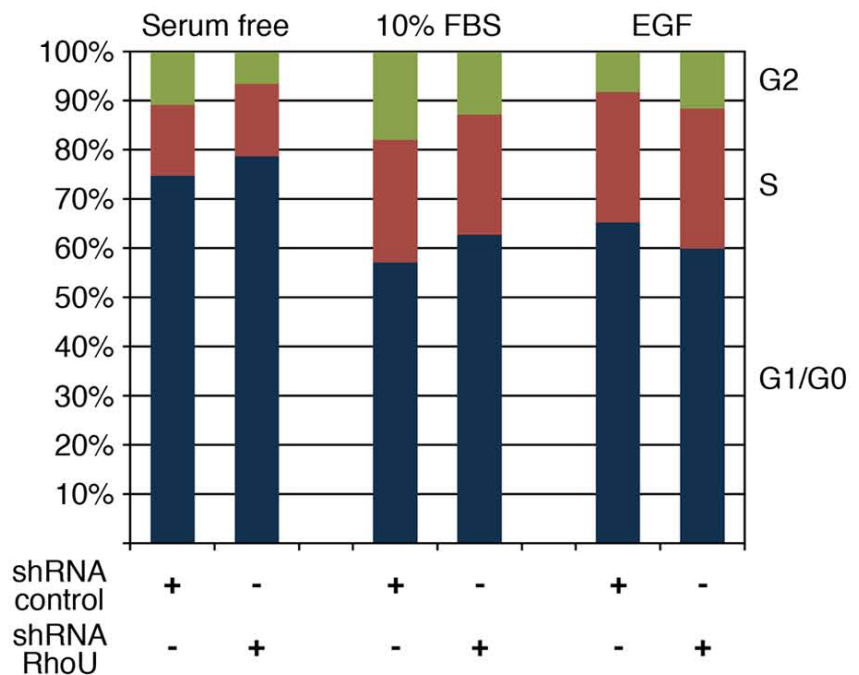

Supplement: E10-12-0969_1.pdf [file E10-12-0969_1.pdf]
